# Supplementary material for: Coordinately unsaturated O2c–Ti5c–O2c sites promote the reactivity of Pt/TiO2 catalysts in the solvent-free oxidation of n-octanol
Source: Royal Society of Chemistry journal article supplement (doi:10.1039/d1cy00686j), 2021-01-01
Supplement: d1cy00686j1.pdf [file d1cy00686j1.pdf]

## Supporting Information of

### **Coordinately unsaturated $O_{2c}-Ti_{5c}-O_{2c}$ sites promote the reactivity of Pt/TiO<sub>2</sub> catalysts in the solvent-free oxidation of octanol**

*Pengfei Yang<sup>1</sup>, Mark Douthwaite<sup>2</sup>, Jiahao Pan<sup>1</sup>, Lirong Zheng<sup>3</sup>, Song Hong<sup>1</sup>, David J. Morgan<sup>2</sup>, Mingyu Gao<sup>1</sup>, Dianqing Li<sup>1</sup>, Junting Feng<sup>1\*</sup>, and Graham J. Hutchings<sup>2\*</sup>*

<sup>1</sup> State Key Laboratory of Chemical Resource Engineering, Beijing University of Chemical Technology, People's Republic of China

<sup>2</sup> Max Planck- Cardiff Centre on the Fundamentals of Heterogeneous Catalysis FUNCAT, Cardiff Catalysis Institute, School of Chemistry, Cardiff University, Main Building, Park Place, Cardiff, CF10 3AT (UK)

<sup>3</sup> Institute of High Energy Physics, Chinese Academy of Sciences, Beijing 100049, People's Republic of China

\* Corresponding author

Address: Box 98, 15 Bei San Huan East Road, Beijing 100029, China

Tel: +86 10 64436992 Fax: +86 10 64436992

E-mail address: [fengjt@mail.buct.edu.cn](mailto:fengjt@mail.buct.edu.cn) (Junting Feng); [Hutch@cardiff.ac.uk](mailto:Hutch@cardiff.ac.uk) (Graham Hutchings)

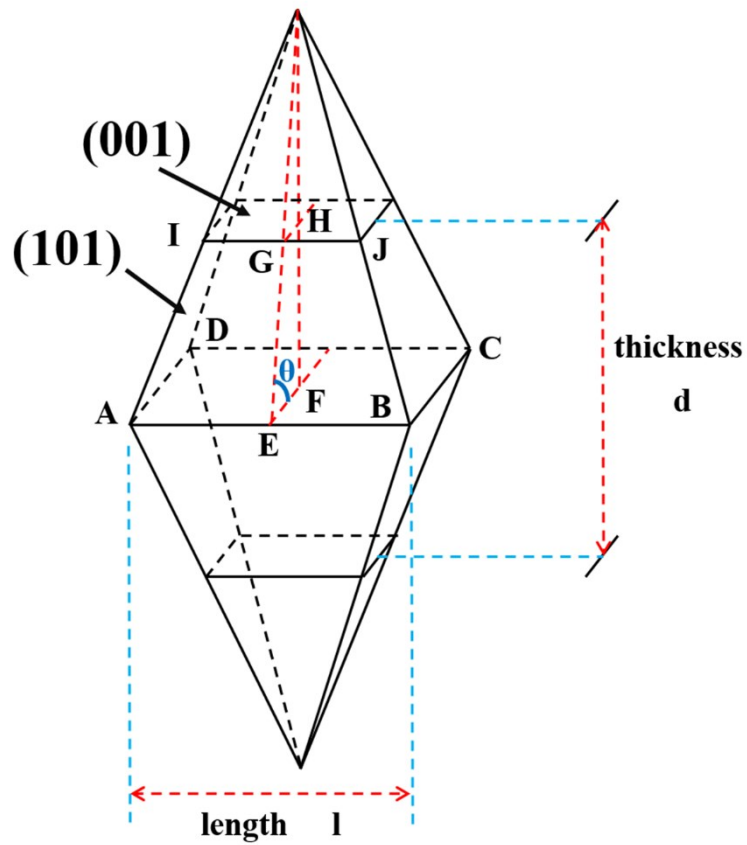

**Figure S1** An model of anatase  $\text{TiO}_2$  single crystal for calculation of geometrical characteristics.

Table S1 The properties of synthesized  $\text{TiO}_2$  with different facets exposed and the series Pt/ $\text{TiO}_2$  catalysts

|                                       | BET surface<br>( $\text{m}^2/\text{g}$ ) | Pt loading<br>(wt.%) |
|---------------------------------------|------------------------------------------|----------------------|
| $\text{TiO}_2$ -101                   | 52.0                                     | -                    |
| $\text{TiO}_2$ -001                   | 21.8                                     | -                    |
| Pt/ $\text{TiO}_2$ -101-Air           | 53.1                                     | 0.96                 |
| Pt/ $\text{TiO}_2$ -001-Air           | 26.6                                     | 0.99                 |
| Pt/ $\text{TiO}_2$ -101- $\text{H}_2$ | 50.1                                     | 1.02                 |
| Pt/ $\text{TiO}_2$ -001- $\text{H}_2$ | 24.8                                     | 1.01                 |

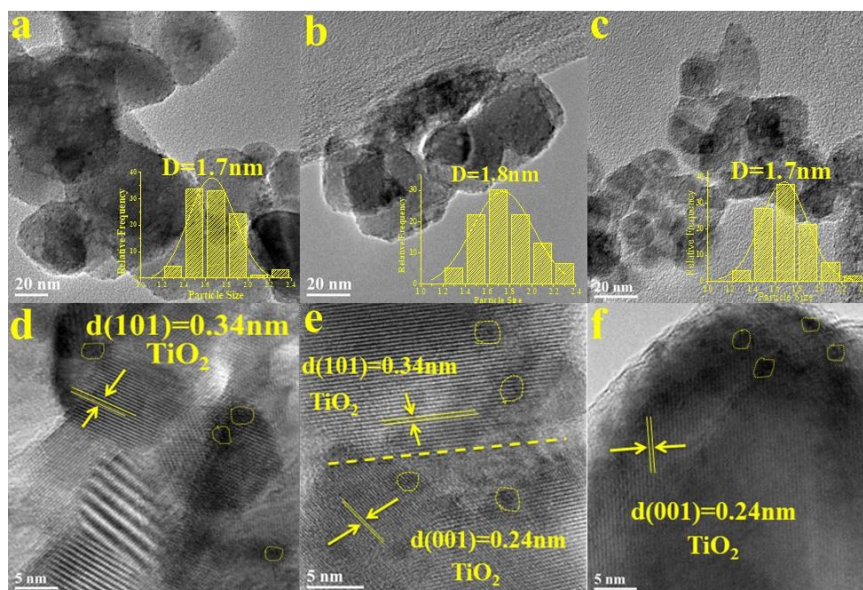

Figure S2 HRTEM images of Pt/TiO<sub>2</sub>-101-Air-500°C (a and d), Pt/TiO<sub>2</sub>-101-001-Air-500°C (b and e) and Pt/TiO<sub>2</sub>-001-Air-500°C (c and f)

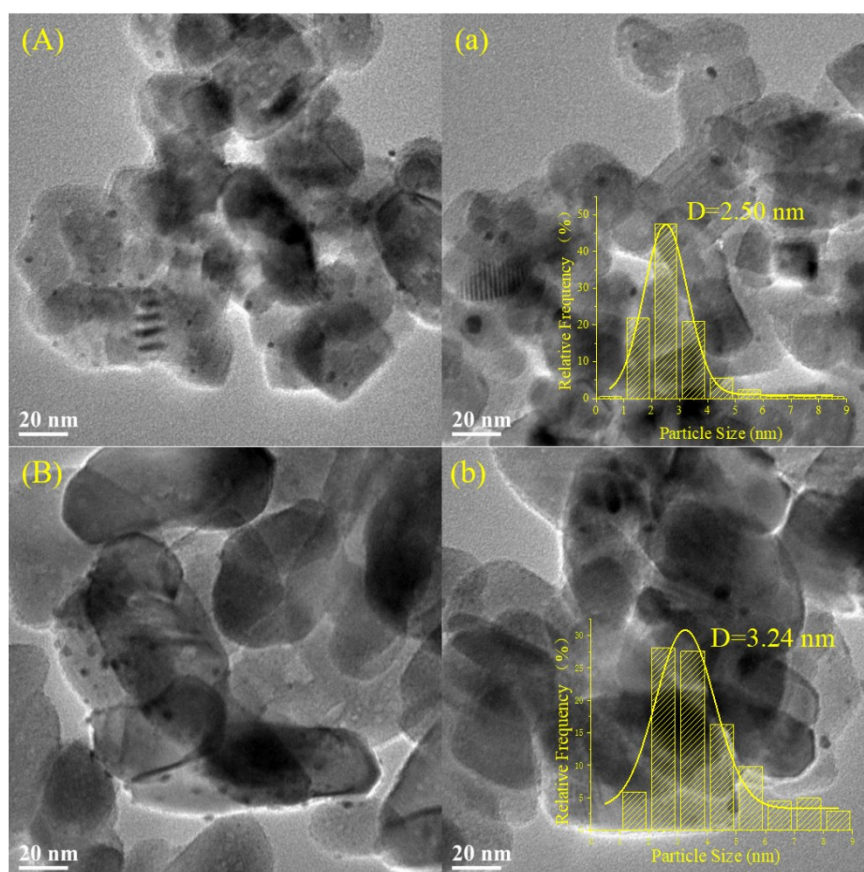

Figure S3 HRTEM images of Pt/TiO<sub>2</sub>-101-H<sub>2</sub> (A and a) and Pt/TiO<sub>2</sub>-001-H<sub>2</sub> (B and b)

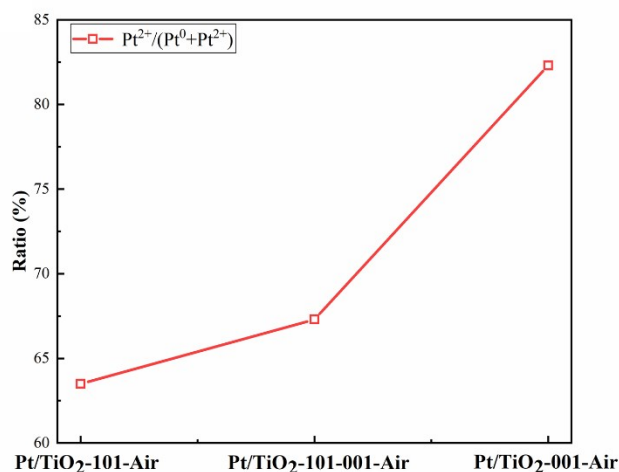

Figure S4 The ratio of  $Pt^{2+}/(Pt^{2+}+Pt^0)$  over the calcined  $Pt/TiO_2$  with different facets exposed.

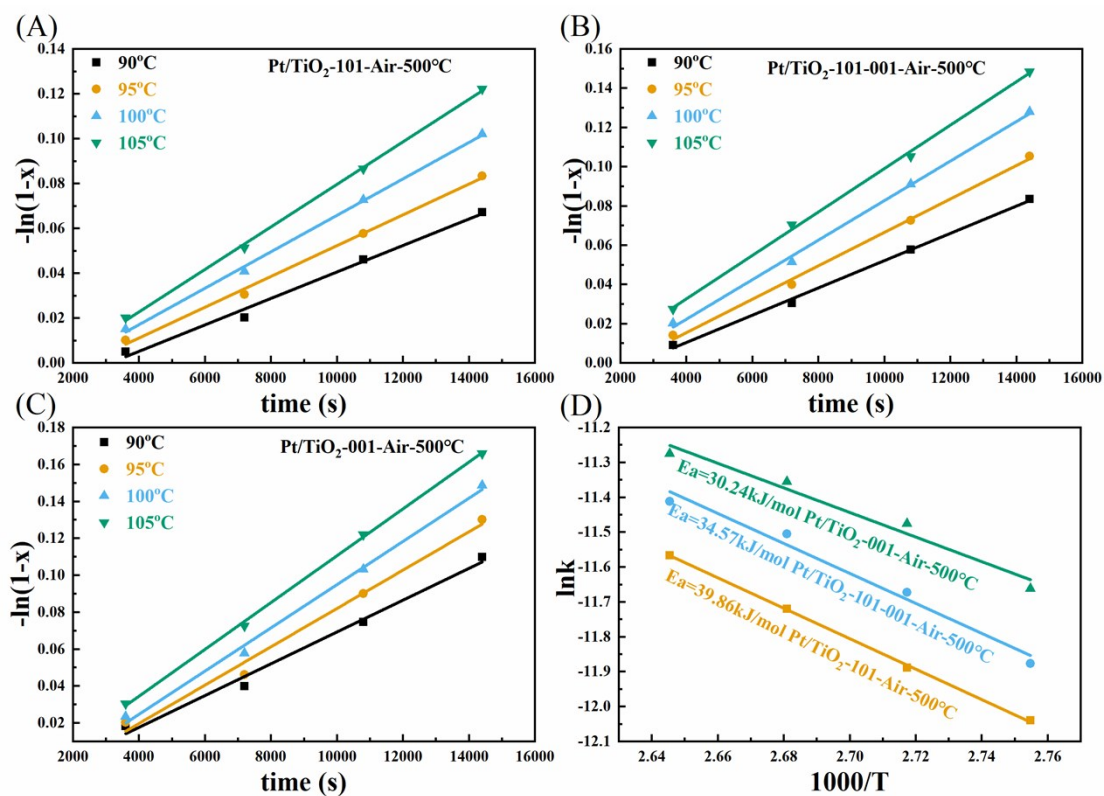

Figure S5 Time-conversion plots at various temperatures for  $Pt/TiO_2-101-Air$  (A),  $Pt/TiO_2-101-001-Air$  (B), and  $Pt/TiO_2-001-Air$  (C) and Arrhenius plots (D) for n-octanol oxidation.

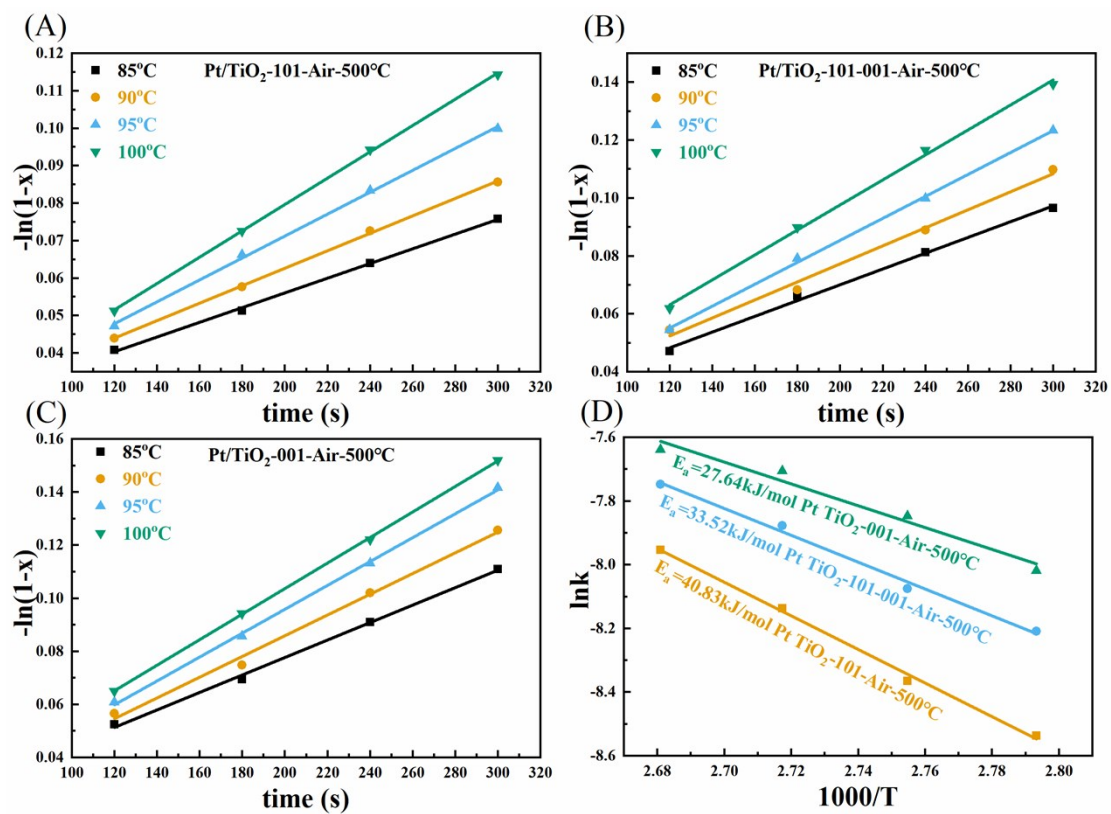

Figure S6 Time-conversion plots at various temperatures for Pt/TiO<sub>2</sub>-101-Air (A), Pt/TiO<sub>2</sub>-101-001-Air (B), and Pt/TiO<sub>2</sub>-001-Air (C) and Arrhenius plots (D) for octanal oxidation.
